# Supplementary material for: Comparison and interpretation of characteristics of Rhizosphere microbiomes of three blueberry varieties
Source: PubMed Central journal article supplement (PMC7821519; doi:10.1186/s12866-021-02092-7), 2021-01-22
Supplement: 12866_2021_2092_MOESM2_ESM.pdf [file 12866_2021_2092_MOESM2_ESM.pdf]

**Supplementary Table 1. Number of processed sequencing reads and estimates for the diversity of each microbial community**

| Sample                       | Raw data | Clean data | Used data | Observed OTUs | Shannon  | Chao 1   | Simpson    |
|------------------------------|----------|------------|-----------|---------------|----------|----------|------------|
| Bulk Soil1                   | 83258    | 73918      | 46537     | 2146          | 9.230445 | 3231.839 | 0.99488515 |
| Bulk Soil2                   | 48961    | 42517      | 24432     | 2421          | 9.433061 | 3712.503 | 0.99601228 |
| Bulk Soil3                   | 51996    | 46436      | 25518     | 2251          | 9.099705 | 3429.491 | 0.99415277 |
| Bulk Soil4                   | 65834    | 57467      | 32997     | 1865          | 8.709573 | 3020.399 | 0.99396142 |
| Bulk Soil5                   | 52241    | 45042      | 26035     | 2548          | 9.653181 | 3710.429 | 0.99656021 |
| Rabbiteye Blueberry1         | 49258    | 41775      | 26941     | 1845          | 8.34435  | 2967.343 | 0.991005   |
| Rabbiteye Blueberry2         | 60512    | 53176      | 34752     | 1725          | 7.911405 | 2875.88  | 0.98440264 |
| Rabbiteye Blueberry3         | 58930    | 52222      | 33871     | 2065          | 8.622258 | 3278.245 | 0.99245111 |
| Rabbiteye Blueberry4         | 47978    | 40708      | 25395     | 2149          | 8.685778 | 3394.933 | 0.99240688 |
| Rabbiteye Blueberry5         | 57201    | 49391      | 30277     | 2053          | 8.375497 | 3536.385 | 0.98873309 |
| Northern Highbush Blueberry1 | 54286    | 47645      | 27305     | 1623          | 8.202737 | 2568.156 | 0.99063691 |
| Northern Highbush Blueberry2 | 48791    | 41985      | 24396     | 1597          | 8.41084  | 2500.973 | 0.99278961 |
| Northern Highbush Blueberry3 | 70267    | 62022      | 35419     | 1654          | 8.346727 | 2611.737 | 0.99174458 |
| Northern Highbush Blueberry4 | 64119    | 56717      | 30378     | 1557          | 7.974618 | 2432.548 | 0.98789479 |
| Northern Highbush Blueberry5 | 62380    | 53645      | 32754     | 1572          | 8.502944 | 2357.987 | 0.99279721 |
| Southern Highbush Blueberry1 | 76321    | 70488      | 45986     | 1495          | 7.819656 | 2450.277 | 0.9872672  |
| Southern Highbush Blueberry2 | 44543    | 37328      | 22698     | 2221          | 9.152915 | 3356.637 | 0.99525945 |
| Southern Highbush Blueberry3 | 39317    | 31591      | 18652     | 2248          | 9.251683 | 3453.128 | 0.99585147 |
| Southern Highbush Blueberry4 | 53433    | 45417      | 27334     | 1836          | 8.492031 | 2788.503 | 0.99191247 |
| Southern Highbush Blueberry5 | 56481    | 48223      | 28578     | 2199          | 9.230829 | 3142.623 | 0.99580421 |

Note: As to the values of Shannon, Chao 1 and PD whole tree were the maximum value obtained from the results of QIIME.
